# Supplementary material
Source: HighWire-hosted journal article supplement (https://emj.bmj.com/content/40/7/499)
Supplement: inline-supplementary-material-3 [file inline-supplementary-material-3.pdf]

### خلاصة

الأهداف: يُستخدم الباراسيتامول، والأدوية غير الستيرويدية المضادة للالتهابات، والمواد الأفيونية، عن طريق الحقن الوريدي أو العضلي، على نطاق واسع لتوفير التسكين للمرضى الذين يعانون من آلام متوسطة إلى شديدة. قيمت هذه المراجعة المنهجية والتحليل التلوي مستوى التسكين الذي يقدمه الباراسيتامول الوريدي وحده مقارنة بمضادات الالتهاب غير الستيرويدية، عن طريق الحقن الوريدي أو العضلي، أو المواد الأفيونية عن طريق الحقن الوريدي في البالغين الذين يحضرون إلى قسم الطوارئ المصابين بالألم حاد.

المنهج: بحث اثنان من المؤلفين بشكل مستقل في PubMed (MEDLINE) و Web of Science و EMBASE (OVID) ، ومكتبة Cochrane و SCOPUS و Google Scholar (من 3 مارس 2021 ، حتى 20 مايو 2022) عن التجارب العشوائية دون قيود على اللغة أو التاريخ. تم تقييم التجارب السريرية باستخدام أداة خطر التحيز (ROB 2). كانت النتيجة الأولية هي فرق المتوسط للحد من الألم في الدقيقة 30 بعد إعطاء التسكين. وكانت النتائج الثانوية هي فرق المتوسط في تقليل الألم عند الدقيقة 60 و 90 و 120، والحاجة إلى تسكين الإنقاذ، وحدث الأعراض السلبية.

النتائج: تم تضمين 27 تجربة (5427 مريضاً) في المراجعة المنهجية وخمسة وعشرين تجربة (5006 مريضاً) في التحليل التلوي. لم يكن هناك فرق كبير في تقليل الألم في الدقيقة 30 بين مجموعة الباراسيتامول الوريدي مقابل المواد الأفيونية حيث كان فرق المتوسط (95%CI: -1.49, 1.22) (-0.13)، ولم يكن هناك فرق بين الباراسيتامول الوريدي مقابل مضادات الالتهاب غير الستيرويدية ، فرق المتوسط (95%CI: -1.0, 1.54) (-0.27). أيضاً لم يكن هناك فرق عند الدقيقة 60 عند مقارنة الباراسيتامول الوريدي مقابل المواد الأفيونية حيث كان فرق المتوسط (95%CI: -2.69, 2.52) (-0.09) أو مقابل مضادات الالتهاب غير الستيرويدية، فرق المتوسط (95%CI: 0.11, 0.91) (0.51). كانت جودة الأدلة باستخدام منهجية GRADE منخفضة بالنسبة إلى فرق المتوسط في درجات الألم.

كانت الحاجة إلى تسكين الإنقاذ في الدقيقة 30 أعلى بشكل ملحوظ في مجموعة الباراسيتامول الوريدي مقارنة بمجموعة مضادات الالتهاب غير الستيرويدية حيث كانت نسبة المخاطر (95%CI: 1.23, 1.83) (1.50)، مع عدم وجود فرق بين مجموعة الباراسيتامول الوريدي ومجموعة المواد الأفيونية، نسبة المخاطر (95%CI: 0.67, 1.70) (1.07). كانت الأعراض الجانبية الضارة أقل بنسبة ٥٠ ٪ في مجموعة الباراسيتامول الوريدي مقارنة بمجموعة المواد الأفيونية، نسبة المخاطر (95%CI: 0.40, 0.62) (0.50). بينما لم يلاحظ أي فرق بين مجموعة الباراسيتامول الوريدي مقارنة بمجموعة مضادات الالتهاب غير الستيرويدية، نسبة المخاطر (95%CI: 0.78, 2.15) (1.30).

الخاتمة: المرضى الذين حضروا إلى قسم الطوارئ يعانون من مجموعة متنوعة من حالات الألم المختلفة، وفر الباراسيتامول الوريدي مستويات مماثلة من تخفيف الآلام مقارنة بالمواد الأفيونية أو مضادات الالتهاب غير الستيرويدية في الدقيقة 30 بعد إعطاء العلاج. كان لدى المرضى الذين تم علاجهم بمضادات الالتهاب غير الستيرويدية مخاطر أقل للتسكين الإنقاذي، وتسبب المواد الأفيونية المزيد من الأعراض الجانبية، مما يشير إلى أن مضادات الالتهاب غير الستيرويدية هي الخيار الأول للتسكين والباراسيتامول الوريدي كبديل مناسب.

الكلمات الرئيسية: تسكين، إدارة الألم، قسم الطوارئ، الم حاد، الباراسيتامول، مضادات الالتهاب غير الستيروئيدية، المواد الأفيونية.
